# Supplementary material
Source: PubMed Central journal article supplement (PMC3812378)

## Supplemental Figure 1. CID spectra of changed proteins at 72 hrs

### 1. beta-enolase-like [Macaca mulatta]

GNPTVEVDLHTAK

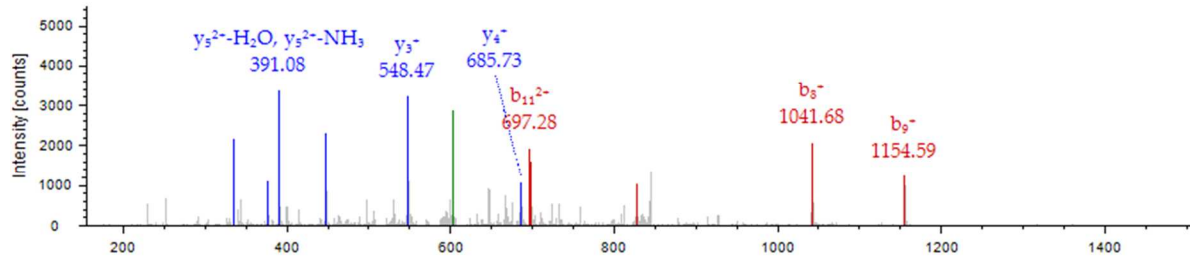

### 2. fructose-bisphosphate aldolase A isoform 1 [Macaca mulatta]

ADDGRFPQVIK

Extracted from: D:\ArchivedData\Yashu\CardiacAGMhigh abundance\CardiacAGMHigh3\_1\_110411\100mM.raw #3420 RT: 43.16  
ITMS, CID, z=+3, Mono m/z=601.02081 Da, MH+=1801.04789 Da, Match Tol.=1.1 Da

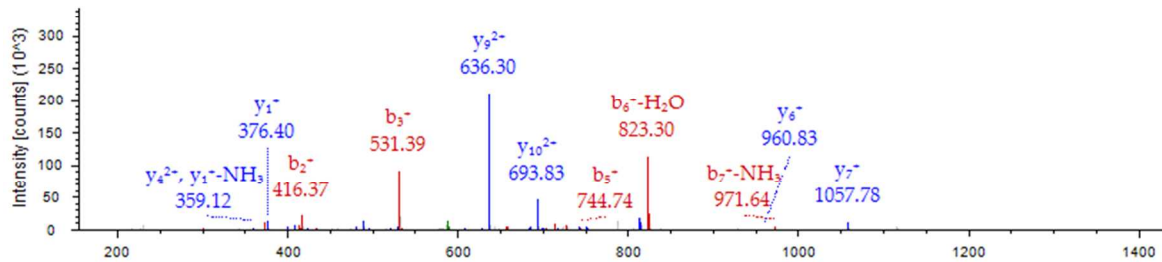

### 3. glycogen phosphorylase, muscle form isoform 1 [Macaca mulatta]

TVMIGGKAAPGYHMAK

Extracted from: D:\ArchivedData\Yashu\CardiacAGMhigh abundance\CardiacAGMHigh6\_1\_103011\500mM.raw #3546 RT: 45.52  
ITMS, CID, z=+3, Mono m/z=588.99597 Da, MH+=1764.97336 Da, Match Tol.=1.1 Da

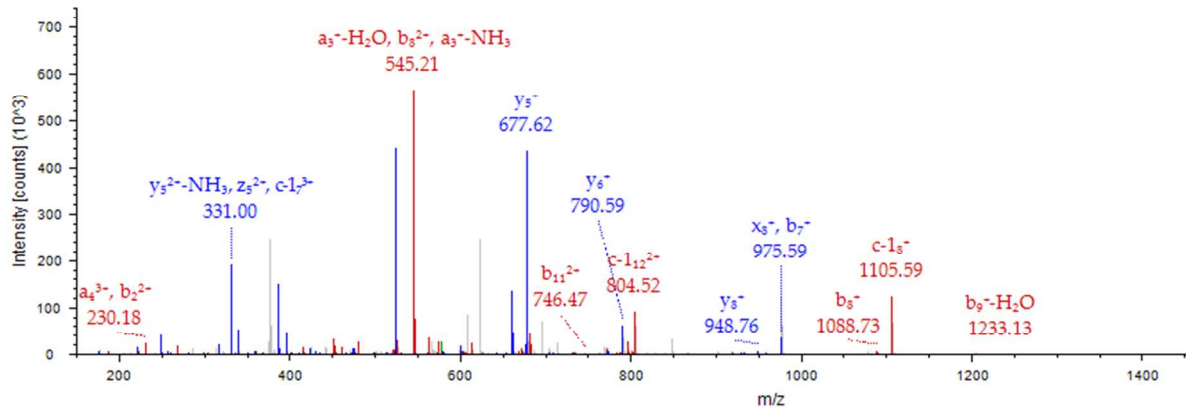

### CQEKVSALYKNPR

Extracted from: D:\ArchivedData\Yashu\CardiacAGM\high abundance\CardiacAGMHigh6\_1\_103011\100mM.raw #2550 RT: 33.11  
ITMS, CID, z=+3, Mono m/z=773.77655 Da, MH+=2319.31510 Da, Match Tol.=1.1 Da

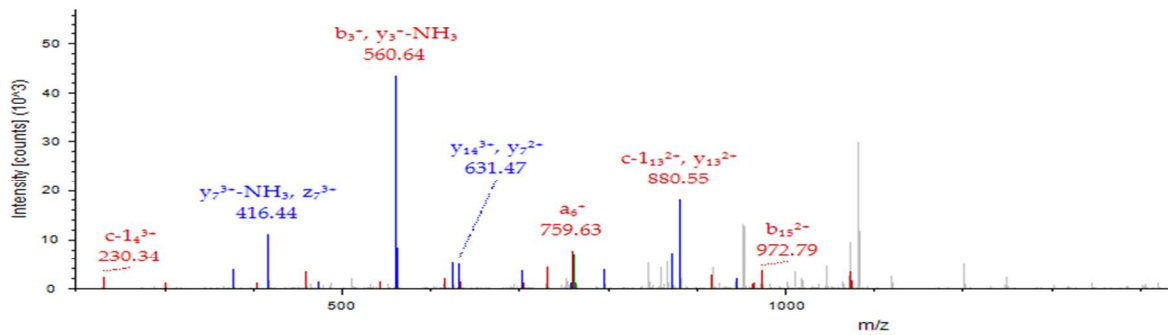

### 4. serum amyloid A protein-like isoform 1 [Macaca mulatta]

#### GPGGAWAAEVIDARENIQK

Extracted from: D:\ArchivedData\Yashu\CardiacAGM\high abundance\CardiacAGMHigh3\_1\_110411\100mM.raw #7831 RT: 92.37  
ITMS, CID, z=+3, Mono m/z=843.13153 Da, MH+=2527.38004 Da, Match Tol.=1.1 Da

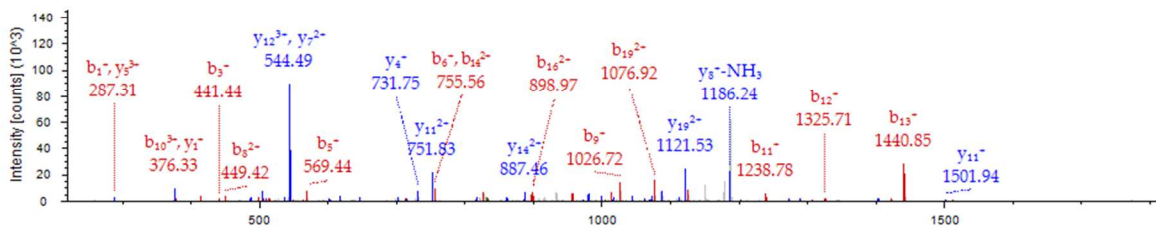

#### GNYDAAQRGPGGAWAAEVIDARENIQK

Extracted from: D:\ArchivedData\Yashu\CardiacAGM\high abundance\CardiacAGMHigh6\_1\_103011\200mM.raw #6366 RT: 74.84  
ITMS, CID, z=+4, Mono m/z=851.44745 Da, MH+=3402.76797 Da, Match Tol.=1.1 Da

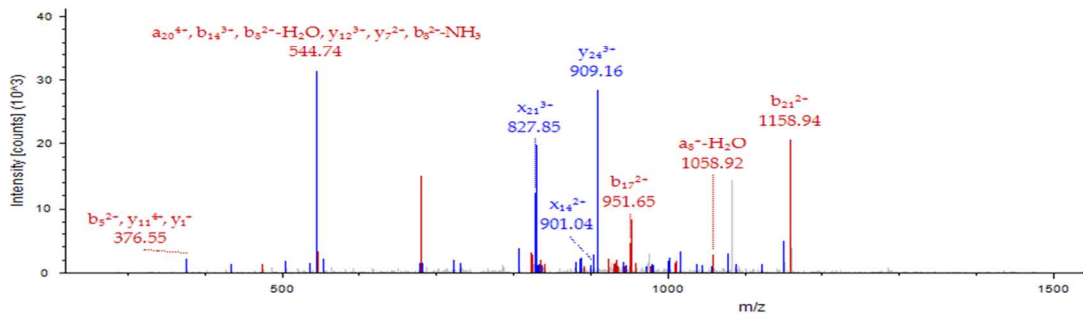

### 5. Peroxiredoxin-2 isoform 5 [Macaca mulatta]

#### ATAVVDGAFKEVK

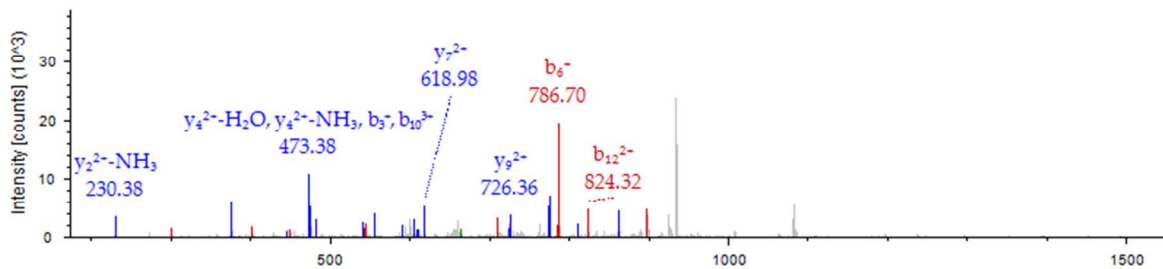

6. alpha-2-HS-glycoprotein isoform 2 [Macaca mulatta]

EHAVEGDCDFQLLK

Extracted from: D:\ArchivedData\Yashu\CardiacAGM\high abundance\CardiacAGMHigh3\_1\_110411\100mM.raw #4200 RT: 51.44  
ITMS, CID, z=+2, Mono m/z=1060.05188 Da, MH+=2119.09648 Da, Match Tol.=0.8 Da

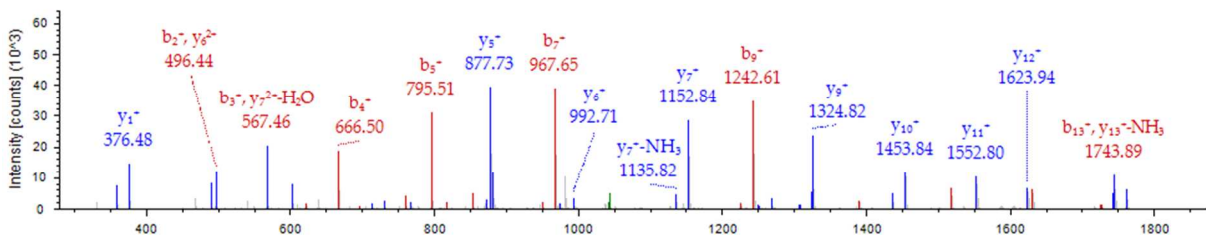

HTLNQIDEVK

Extracted from: D:\ArchivedData\Yashu\CardiacAGM\high abundance\CardiacAGMHigh3\_1\_110411\100mM.raw #4200 RT: 51.44  
ITMS, CID, z=+2, Mono m/z=1060.05188 Da, MH+=2119.09648 Da, Match Tol.=0.8 Da

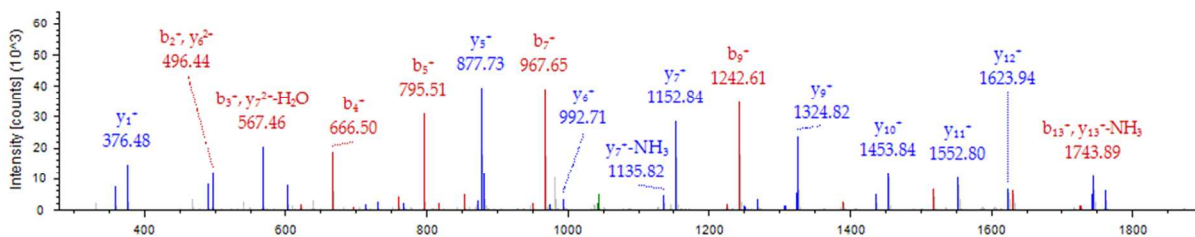

7. apolipoprotein A-I isoform 1 [Macaca mulatta]

LREQLGPVTQEFWDNLEK

Extracted from: D:\ArchivedData\Yashu\CardiacAGM\high abundance\CardiacAGMHigh3\_1\_110411\500mM.raw #7371 RT: 87.34  
ITMS, CID, z=+3, Mono m/z=887.48767 Da, MH+=2660.44846 Da, Match Tol.=0.8 Da

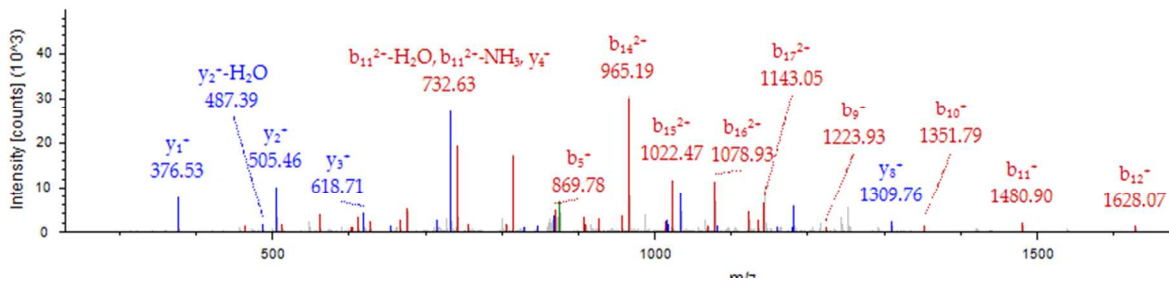

### LLDNWDSVTSTVSK

Extracted from: D:\ArchivedData\Yashu\CardiacAGM\high abundance\CardiacAGMHigh3\_1\_110411\25mM.raw #5858 RT: 67.62  
ITMS, CID, z=+2, Mono m/z=1012.06403 Da, MH+=2023.12078 Da, Match Tol.=0.8 Da

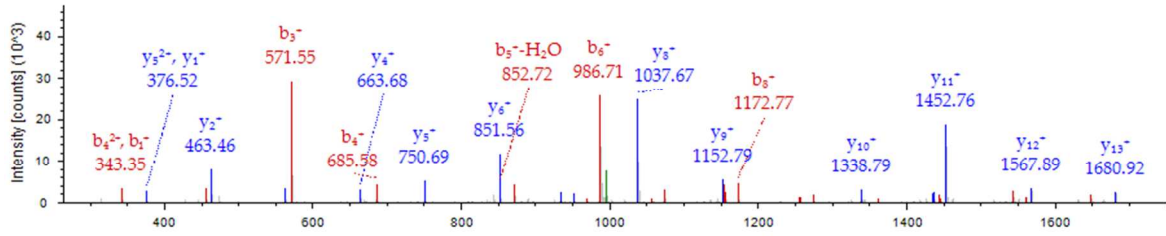

### DYVSQFEGSALGK

Extracted from: D:\ArchivedData\Yashu\CardiacAGM\high abundance\CardiacAGMHigh3\_1\_110411\15mM.raw #2716 RT: 33.92  
ITMS, CID, z=+2, Mono m/z=930.00250 Da, MH+=1858.99773 Da, Match Tol.=0.8 Da

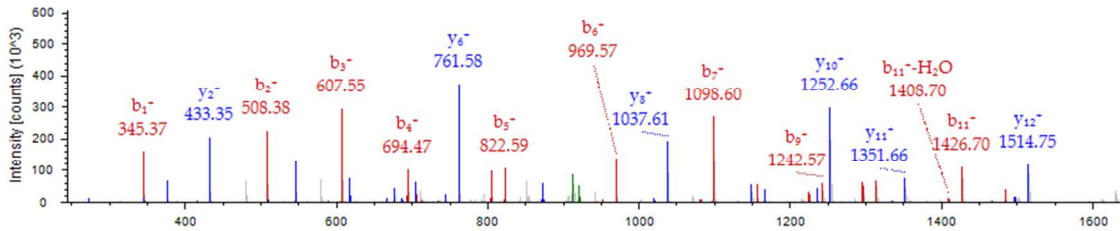

### DLVTVYVEALK

Extracted from: D:\ArchivedData\Yashu\CardiacAGM\high abundance\CardiacAGMHigh3\_1\_110411\15mM.raw #5210 RT: 60.64  
ITMS, CID, z=+2, Mono m/z=854.51331 Da, MH+=1708.01933 Da, Match Tol.=0.8 Da

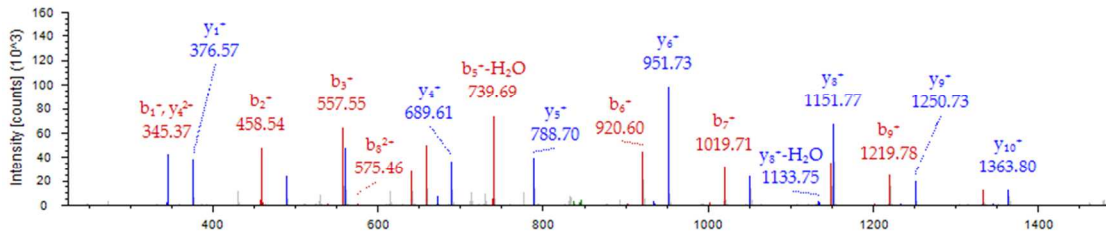

### VKDLVTVYVEALK

Extracted from: D:\ArchivedData\Yashu\CardiacAGM\high abundance\CardiacAGMHigh3\_1\_110411\4xclean.raw #13750 RT: 156.58  
ITMS, CID, z=+3, Mono m/z=722.13031 Da, MH+=2164.37638 Da, Match Tol.=0.8 Da

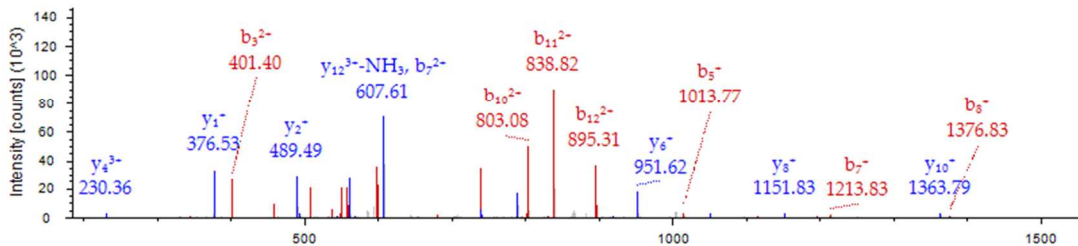

### QGLLPVLESFK

Extracted from: D:\ArchivedData\Yashu\CardiacAGM\high abundance\CardiacAGMHigh3\_1\_110411\15mM.raw #5614 RT: 65.24  
 ITMS, CID, z=+2, Mono m/z=845.02148 Da, MH+=1689.03569 Da, Match Tol.=0.8 Da

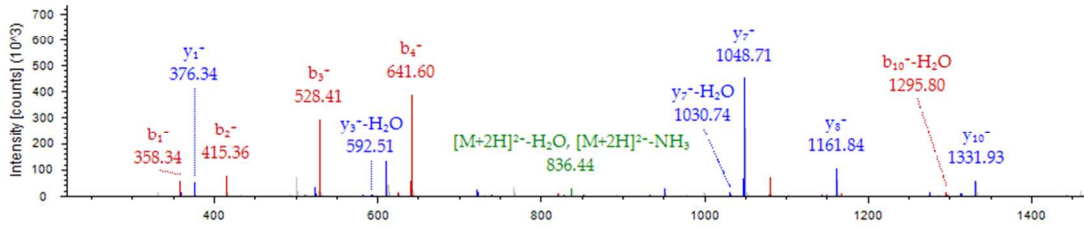

THLAPYSDELK

Extracted from: D:\ArchivedData\Yashu\CardiacAGM\high abundance\CardiacAGMHigh3\_1\_110411\200mM.raw #2614 RT: 34.87  
 ITMS, CID, z=+2, Mono m/z=765.91083 Da, MH+=1530.81438 Da, Match Tol.=0.8 Da

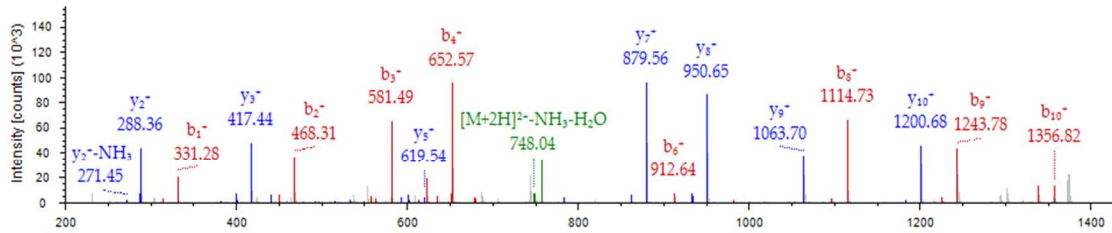

8. apolipoprotein A-II isoform 2 [Macaca mulatta]

VKSPELQAQAK

Extracted from: D:\ArchivedData\Yashu\CardiacAGM\high abundance\CardiacAGMHigh3\_1\_110411\75mM.raw #2565 RT: 34.00  
 ITMS, CID, z=+3, Mono m/z=629.39752 Da, MH+=1886.17801 Da, Match Tol.=0.8 Da

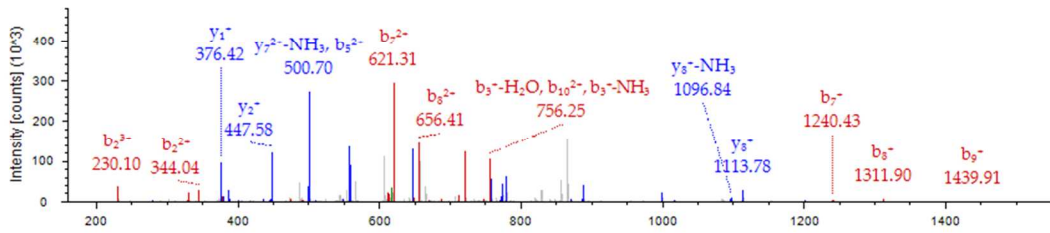

SKEQLTPLVK

Extracted from: D:\ArchivedData\Yashu\CardiacAGM\high abundance\CardiacAGMHigh3\_1\_110411\100mM.raw #3172 RT: 40.46  
 ITMS, CID, z=+3, Mono m/z=610.72919 Da, MH+=1830.17301 Da, Match Tol.=0.8 Da

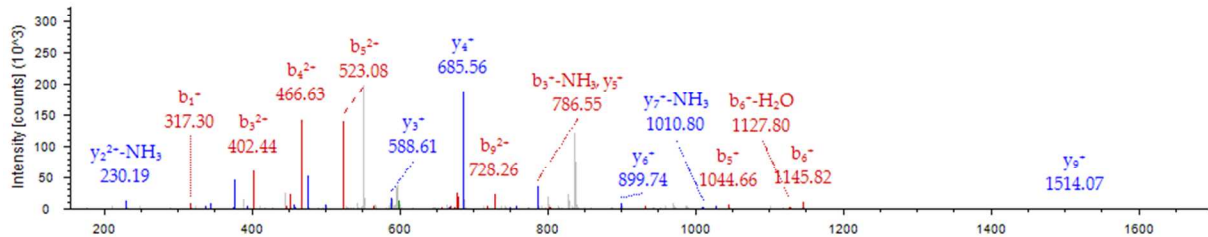

9. inaD-like protein-like [Macaca mulatta]

IVELVK

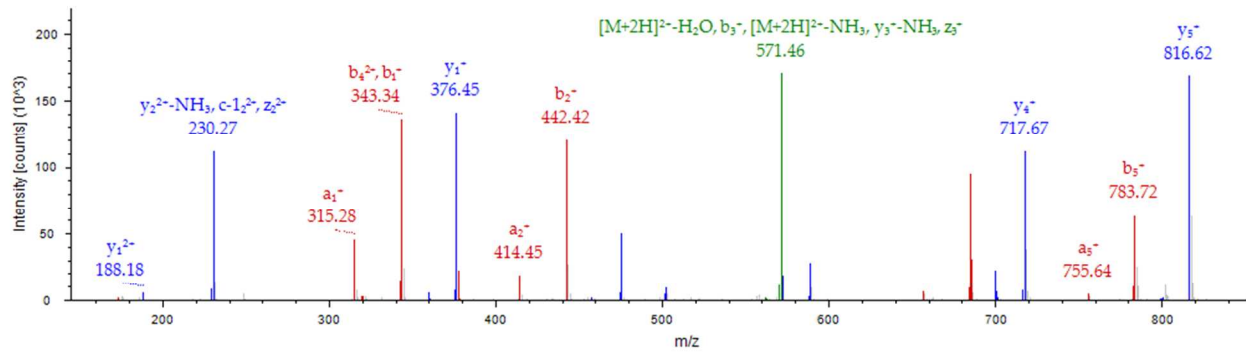

Supplement: NIHMS462515-supplement-1_si_006.pdf [file NIHMS462515-supplement-1_si_006.pdf]
